# Supplementary material for: Microstructural reorganisation and mechanical property enhancement in PHAs and their wood biocomposites through post-fabrication heat-treatment in annealing and partial-melting conditions.
Source: Research Square preprint supplement (doi:10.21203/rs.3.rs-7882411/v1), 2025-11-04
Supplement: Supplementary file 1 [file 8caf583ee6b9d78a6dab60ec.docx]

*Supplementary Data*

Microstructural reorganisation and mechanical property enhancement in PHAs and their wood biocomposites through post-fabrication heat-treatment in annealing and partial-melting conditions.

*Vincent Mathel1,2*, Pauline Le Quellec2, Shazed Aziz1,2, Darren Martin1,2, Peter Halley1,2, Michael Tobias Heitzmann2,3,Luigi-Jules Vandi2,3**

1School of Chemical Engineering, The University of Queensland, Brisbane, QLD 4072, Australia

2Centre for Advanced Materials Processing and Manufacturing (AMPAM), The University of Queensland, Brisbane QLD 4072, Australia

3School of Mechanical and Mining Engineering, The University of Queensland, Brisbane QLD 4072, Australia

*Corresponding authors: *Vincent Mathel (E-mail: v.mathel@uq.edu.au); Luigi-Jules Vandi (E-mail:* [*l.vandi@uq.edu.au*](mailto:l.vandi@uq.edu.au)*)*


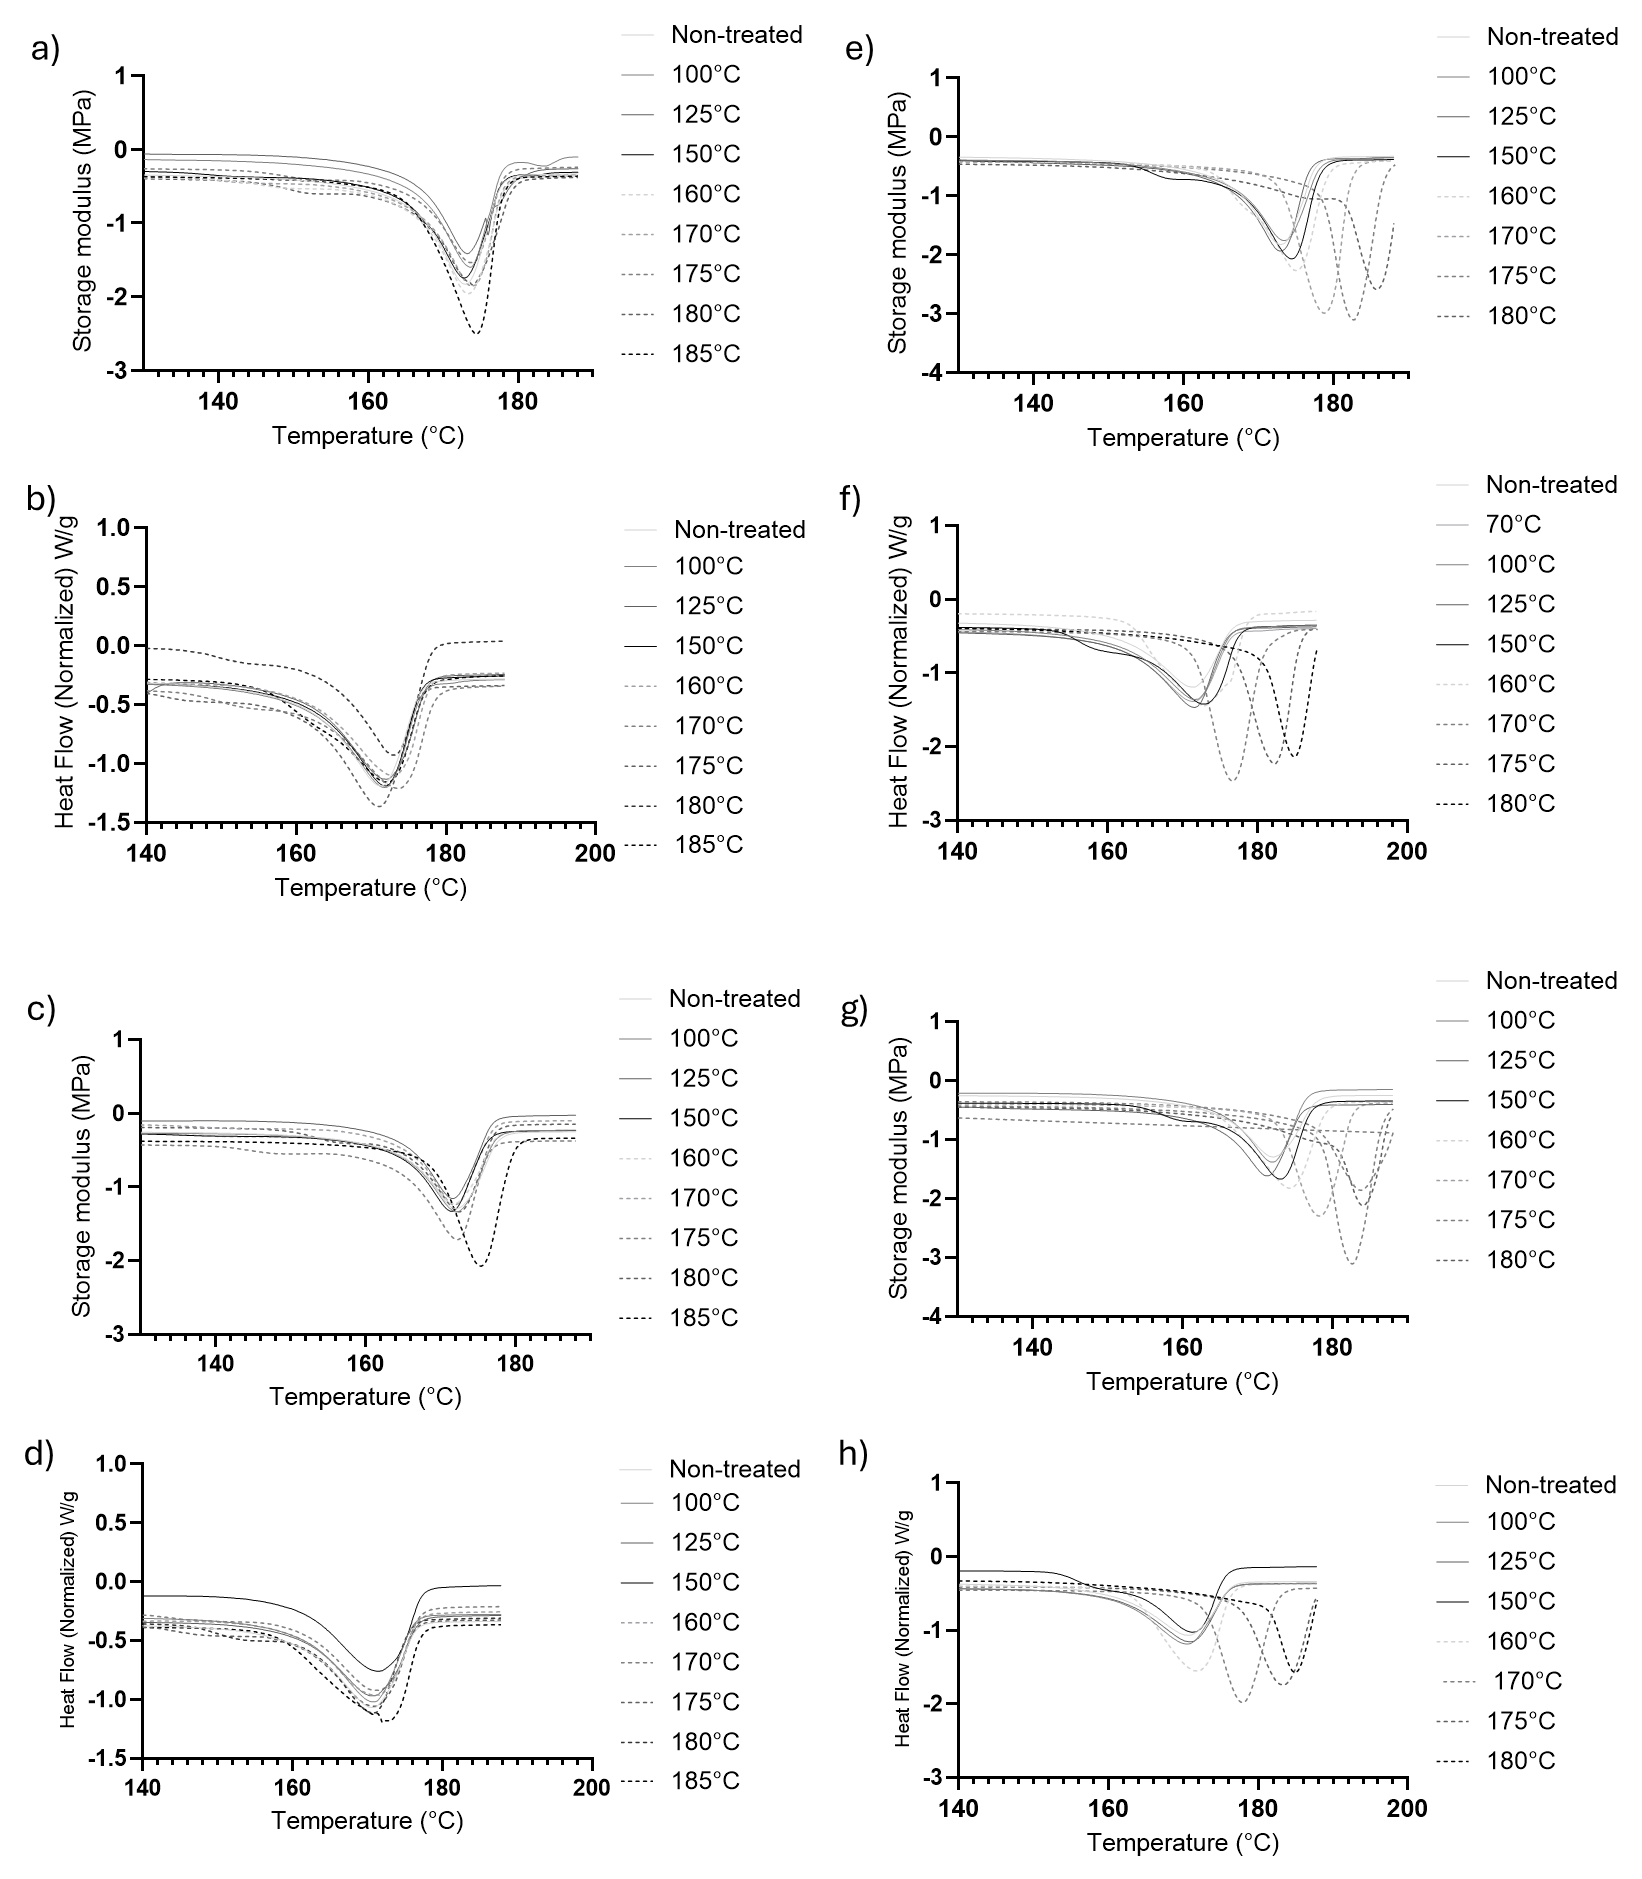


Fig.S1: heating DSC curves obtained after heat post-treatment during 5 min for a) PHBV, b) PHBV/P34HB, c) PHBV-Wood, d) PHBV/P34HB-wood and heat post-treatment during 30 min for e) PHBV, f) PHBV/P34HB, g) PHBV-Wood, h) PHBV/P34HB-wood


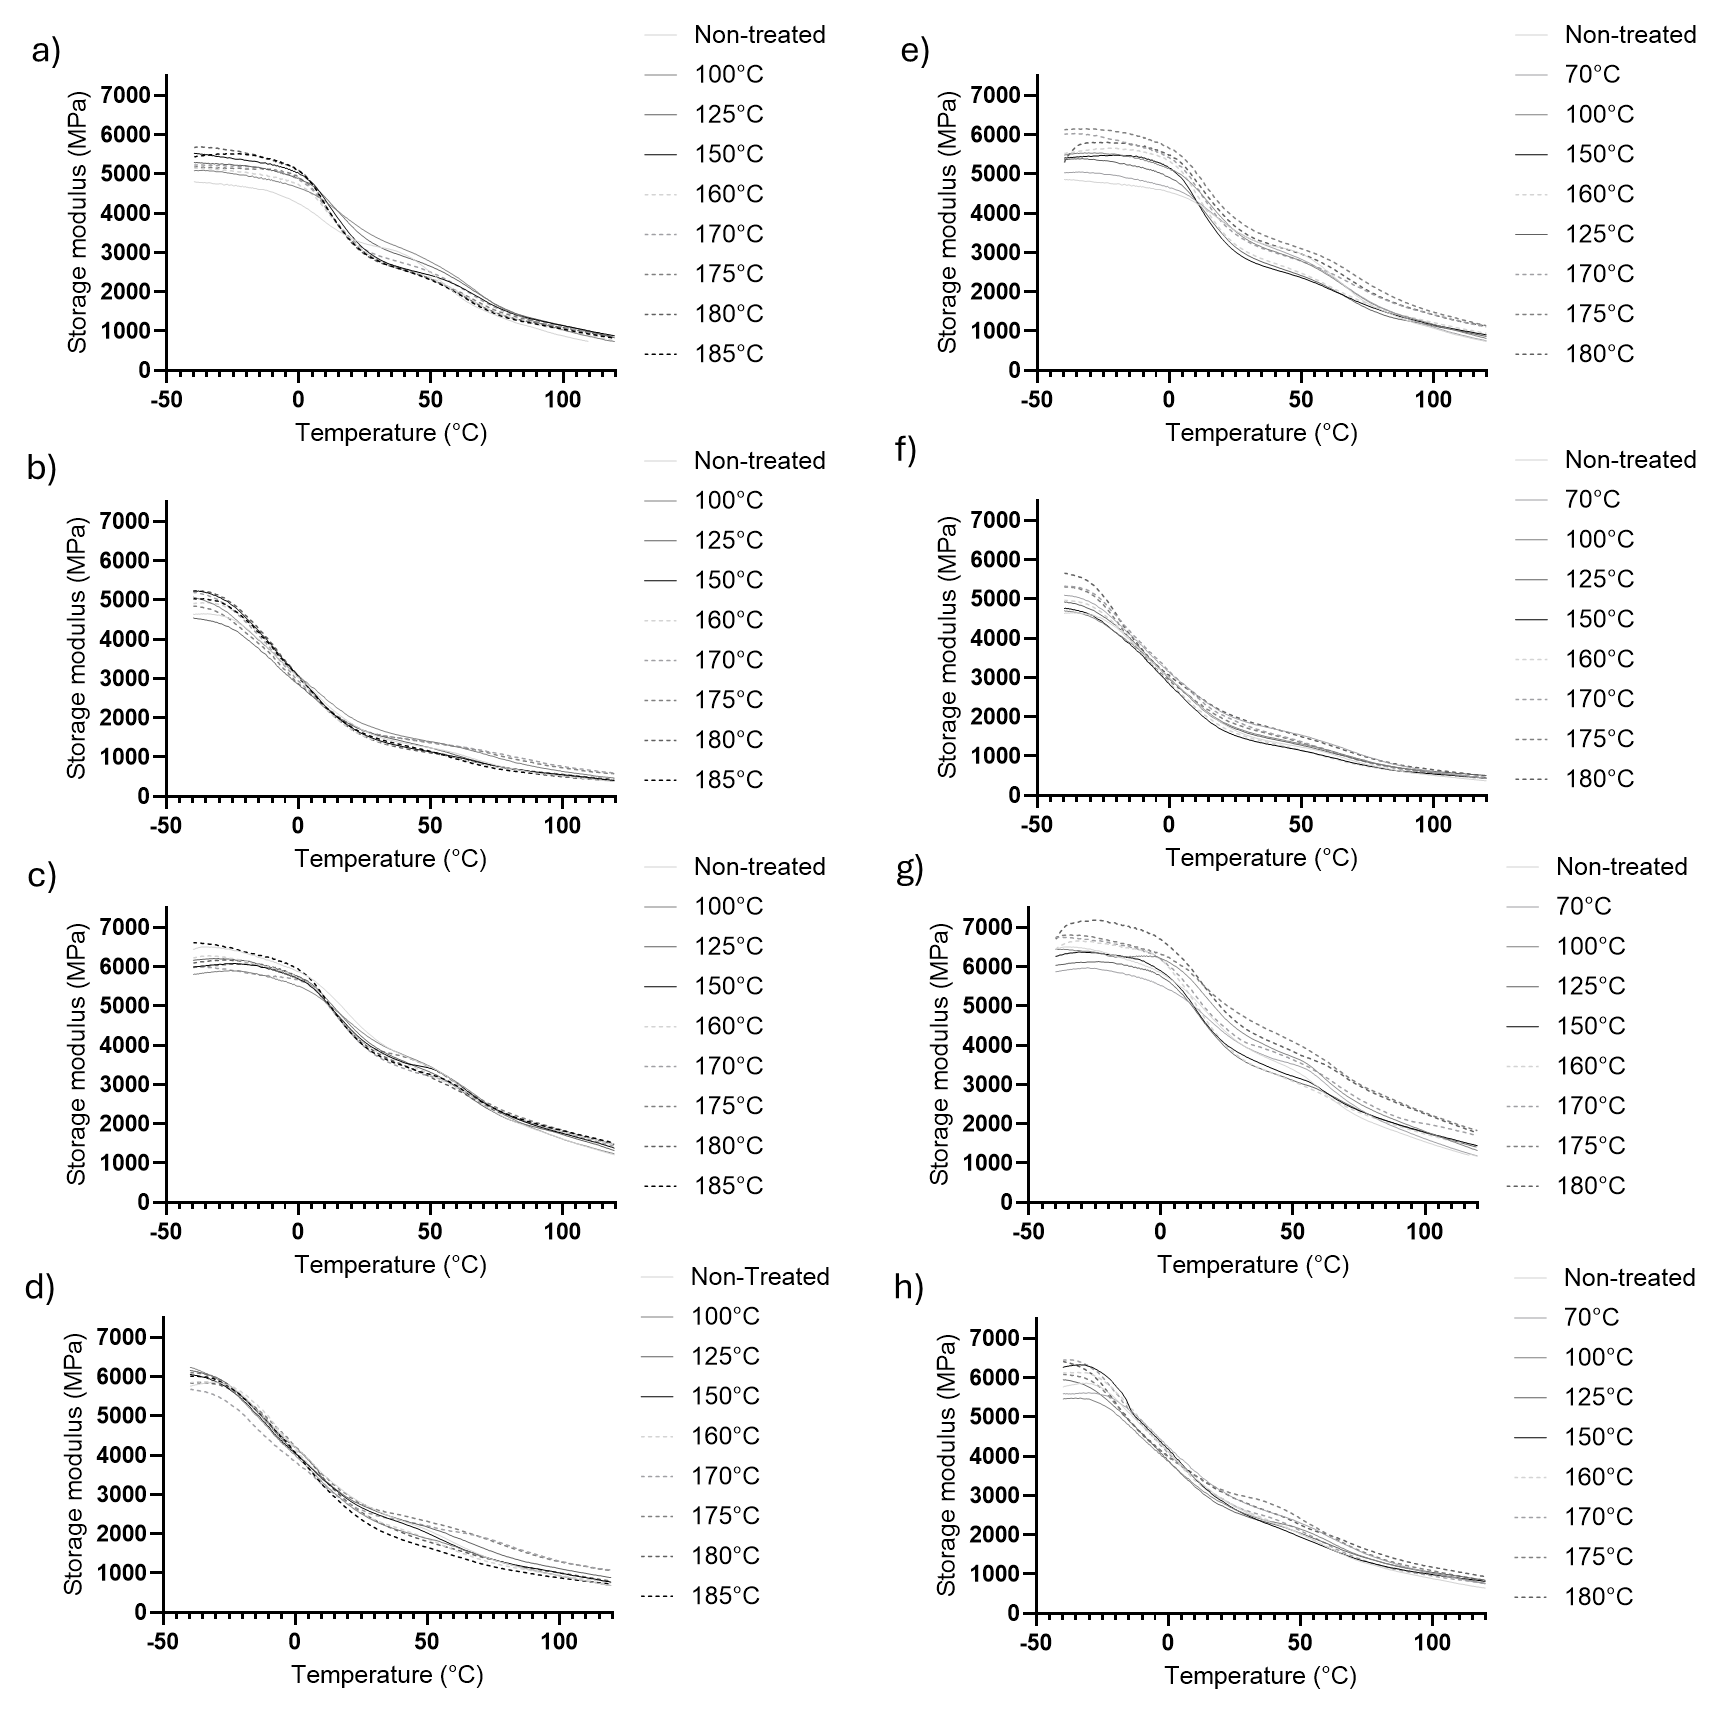


Fig.S2: DMA curves obtained after heat post-treatment during 5 min for a) PHBV, b) PHBV/P34HB, c) PHBV-Wood, d) PHBV/P34HB-wood and heat post-treatment during 30 min for e) PHBV, f) PHBV/P34HB, g) PHBV-Wood, h) PHBV/P34HB-wood

Table S1: Evolution of %MAF and %RAF of materials in function of heat post-treatment condition

| Post-treatment temperature (℃) | % MAF | | | | | | | |
| --- | --- | --- | --- | --- | --- | --- | --- | --- |
| PHBV | | PHBV/P34HB | | PHBV-Wood | | PHBV/P34HB-Wood | |
| ↓ |
| Duration (min) → |
| 5 | 30 | 5 | 30 | 5 | 30 | 5 | 30 |
| Non-treated | 0.37 | | 0.73 | | 0.45 | | 0.63 | |
| 70 | - | 0.40 | - | 0.69 | - | 0.39 | - | 0.57 |
| 100 | 0.42 | 0.45 | 0.72 | 0.71 | 0.38 | 0.41 | 0.70 | 0.59 |
| 125 | 0.48 | 0.54 | 0.72 | 0.73 | 0.45 | 0.47 | 0.64 | 0.64 |
| 150 | 0.55 | 0.55 | 0.78 | 0.75 | 0.43 | 0.47 | 0.65 | 0.65 |
| 160 | 0.52 | 0.53 | 0.76 | 0.76 | 0.44 | 0.51 | 0.67 | 0.65 |
| 170 | 0.49 | 0.52 | 0.73 | 0.73 | 0.46 | 0.44 | 0.62 | 0.65 |
| 175 | 0.52 | 0.47 | 0.71 | 0.73 | 0.40 | 0.37 | 0.64 | 0.57 |
| 180 | 0.56 | 0.48 | 0.78 | 0.72 | 0.45 | 0.43 | 0.68 | 0.62 |
| 185 | 0.55 | - | 0.76 | - | 0.50 | - | 0.72 | - |
|  | % RAF | | | | | | | |
| Non-treated | 35.4±1.5 | | 25.9±0.2 | | 37.2±1.0 | | 22.2±0.5 | |
| 70 | - | 0.46 | - | 0.23 | - | 0.41 | - | 0.30 |
| 100 | 0.43 | 0.40 | 0.19 | 0.20 | 0.41 | 0.39 | 0.20 | 0.27 |
| 125 | 0.37 | 0.31 | 0.20 | 0.17 | 0.35 | 0.30 | 0.22 | 0.22 |
| 150 | 0.30 | 0.29 | 0.15 | 0.16 | 0.36 | 0.30 | 0.23 | 0.21 |
| 160 | 0.34 | 0.30 | 0.16 | 0.16 | 0.33 | 0.27 | 0.21 | 0.22 |
| 170 | 0.35 | 0.30 | 0.16 | 0.18 | 0.31 | 0.31 | 0.22 | 0.23 |
| 175 | 0.32 | 0.35 | 0.17 | 0.19 | 0.36 | 0.36 | 0.23 | 0.29 |
| 180 | 0.29 | 0.33 | 0.14 | 0.19 | 0.31 | 0.31 | 0.19 | 0.23 |
| 185 | 0.30 | - | 0.19 | - | 0.28 | - | 0.17 | - |


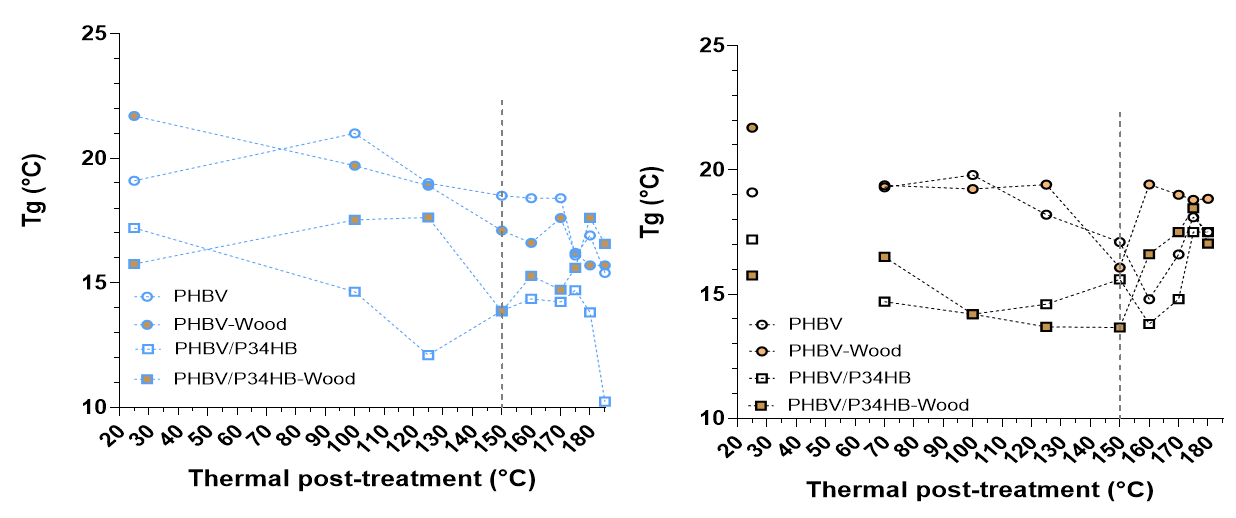


Fig. S3: Evolution of Tg evaluated by DMA for heat post-treated materials for 5 min (left) and 30 min (right)

Table S2: Evolution of *Tg* evaluated by DMA for all materials in function of heat post-treatment condition

| Post-treatment temperature (℃) | *Tg* (℃) | | | | | | | |
| --- | --- | --- | --- | --- | --- | --- | --- | --- |
| PHBV | | PHBV/P34HB | | PHBV-Wood | | PHBV/P34HB-Wood | |
| ↓ |
| Duration (min) → |
| 5 | 30 | 5 | 30 | 5 | 30 | 5 | 30 |
| Non-treated | 19.1 | | 17.2 | | 21.7 | | 15.8 | |
| 70 | - | 19.3 | - | 14.7 | - | 19.4 | - | 16.5 |
| 100 | 21.0 | 19.8 | 14.6 | 14.2 | 19.7 | 19.2 | 17.5 | 14.2 |
| 125 | 19.0 | 18.2 | 12.1 | 14.6 | 18.9 | 19.4 | 17.6 | 13.7 |
| 150 | 18.5 | 17.1 | 13.8 | 15.6 | 17.1 | 16.1 | 13.9 | 13.7 |
| 160 | 18.4 | 14.8 | 14.3 | 13.8 | 16.6 | 19.4 | 15.3 | 16.6 |
| 170 | 18.4 | 16.6 | 14.2 | 14.8 | 17.6 | 19.0 | 14.7 | 17.5 |
| 175 | 16.1 | 18.1 | 14.7 | 17.5 | 16.2 | 18.8 | 15.6 | 18.5 |
| 180 | 16.9 | 17.5 | 13.8 | 17.5 | 15.7 | 18.8 | 17.6 | 17.0 |
| 185 | 15.4 | - | 10.2 | - | 15.7 | - | 16.6 | - |
